# Supplementary material for: Effect of Fe-doping on the structure and magnetoelectric properties of (Ba0.85Ca0.15)(Ti0.9Zr0.1)O3 synthesized by a chemical route
Source: Royal Society of Chemistry journal article supplement (doi:10.1039/c5tc00914f), 2015-12-22
Supplement: c5tc00914f1.pdf [file c5tc00914f1.pdf]

Supplementary data

**Effect of Fe-doping on structure and magnetoelectric properties of  
(Ba<sub>0.85</sub>Ca<sub>0.15</sub>)(Ti<sub>0.9</sub>Zr<sub>0.1</sub>)O<sub>3</sub> synthesized by chemical route**

E.Venkata Ramana<sup>1\*</sup>, F.Figueiras<sup>2</sup>, A.Mahajan<sup>3</sup>, David Maria Tobaldi<sup>4</sup>, Benilde F.O. Costa<sup>5</sup>, M.P.F.Graça<sup>1</sup> and M.A.Valente<sup>1</sup>

<sup>1</sup> I3N-Aveiro, Department of Physics, University of Aveiro, Aveiro-3810 193, Portugal.

<sup>2</sup> CICECO, University of Aveiro, Aveiro-3810 193, Portugal.

<sup>3</sup> School of Engineering and Material Science, Queen Mary University of London,  
London, E1 4NS, UK.

<sup>4</sup> Department of Materials and Ceramics Engineering / CICECO, University of Aveiro,  
Aveiro-3810 193, Portugal.

<sup>5</sup> CFisUC, Department of Physics, University of Coimbra, Coimbra-3004 516, Portugal.

\* Author for correspondence: [venkataramanaesk@rediffmail.com](mailto:venkataramanaesk@rediffmail.com)

**Rietveld Refinement procedure**

The starting atomic parameters for the tetragonal and rhombohedral phases, described in the space group (SG) *P4mm*, and *R3m*, respectively, were taken from Kwei *et al.* <sup>1</sup>. In the Rietveld refinements, were refined the following parameters: scale-factors and zero-point; the

background profile was modelled using a 10<sup>th</sup> order shifted Chebyshev polynomial function; unit cell parameters and profile coefficients – one Gaussian ( $G_W$ ), an angle-independent term and two Lorentzian terms  $L_X$  and  $L_Y$  – peak correction for asymmetry, and sample displacement effects. Furthermore, atomic positions and isotropic displacement parameters ( $U_{iso}$ ) were also refined; occupancies of Ba and Ca were constrained to be 0.85 and 0.15, respectively, in all the refinements, according to the stoichiometry of the synthesis. Furthermore, the same atomic positions and  $U_{iso}$  were given to these two atoms, and restrained to be identical. Similarly, following the stoichiometry of the synthesis, the occupancies of the  $BO_6$  octahedral site were constrained to be 0.9 and 0.1 for Ti and Zr in BCTZO sample (restraining their atomic position and  $U_{iso}$  to be the same); likewise, in samples where iron was present, the occupancies were also constrained to be the same as those of the synthesis, *i.e.* 0.88, 0.02, and 0.1 for Ti, Fe, and Zr, respectively, in case of Fe-2 (with Ti, Zr, and Fe having restrained the same atomic positions and  $U_{iso}$ ).

Once the bond lengths and bond angles were calculated from the listing of distances and bond angles from GSAS, they were used to obtain a 3D rendering of the tetragonal phase, by means of the VESTA software package <sup>2</sup>. Also, the distortion index ( $D$ ) and quadratic elongation (QE) of the  $BO_6$  octahedral site in the tetragonal phase were calculated, according to the formalisms of Baur <sup>3</sup>, and Robinson *et al.* <sup>4</sup>, respectively.

1. G.H. Kwei, A.C. Lawson S.J.L. Billinge and S.W. Cheong, *J. Phys. Chem.*, 1993, **97**, 2368.
2. K. Momma, F. Izumi, *J. Appl. Crystallogr.*, 2008, **41**, 653.
3. W.H. Baur, *Acta Crystallogr. B.*, 1974, **30**, 1195.
4. K. Robinson, G.V. Gibbs, P.H. Ribbe, *Science.*, 1971, **172**, 567.
